# Supplementary material for: Influence of resin modified glass ionomer cement incorporating protein-repellent and antimicrobial agents on supragingival microbiome around brackets: an in-vivo split-mouth 3-month study
Source: PeerJ. 2023 Feb 6;11:e14820. doi: 10.7717/peerj.14820 (PMC9910189; doi:10.7717/peerj.14820)
Supplement: Supplemental Information 1 [file peerj-11-14820-s001.xlsx]

## Sheet: PI
	RMGIC										RMD
	Subject 1	Subject 2	Subject 3	Subject 4	Subject 5	Subject 6	Subject 7	Subject 8	Subject 9	Subject 10	Subject 1	Subject 2	Subject 3	Subject 4	Subject 5	Subject 6	Subject 7	Subject 8	Subject 9	Subject 10
T0	0.66667	0.5	0.66667	0.222222	0	0.66667	0.66667	0.5	0.66667	0.222222	0.66667	0.5	0.66667	0.333334	0	0.66667	0.5	0.66667	0.333334	0
T1	0.66667	0.791668	1	0.333333	0.208333	1	0.66667	1	0.333333	0.791668	0.66667	0.722225	1	0.291667	0.194443	0.66666	0.66667	0.66666	0.722225	0.291667
T2	1.23579	1.3579	1.24579	1.24679	1.35789	1.26667	1	1.26667	1.24679	1.23579	1.24679	1	1.34579	1	0.985432	0.456885	0.546432	0.985432	1	0.546432

## Sheet: GI
	RMGIC										RMD
	Subject 1	Subject 2	Subject 3	Subject 4	Subject 5	Subject 6	Subject 7	Subject 8	Subject 9	Subject 10	Subject 1	Subject 2	Subject 3	Subject 4	Subject 5	Subject 6	Subject 7	Subject 8	Subject 9	Subject 10
T0	0	0.0416667	0.266668	0.0833333	0	0.266668	0	0	0.0416667	0	0	0.0416667	0.222223	0.055555	0	0.222223	0.0416667	0.222223	0.055555	0
T1	0.222223	0.0833333	0.400002	0.222223	0.16665	0.26664	0.222223	0.400002	0.222223	0.0833333	0.111112	0.0833333	0.222223	0.166662	0.16665	0.222212	0.222212	0.222223	0.166662	0.16665
T2	0.444447	0.333323	0.444447	0.266668	0.333323	0.564388	0.333323	0.444447	0.564388	0.499633	0.222223	0.277779	0.38889	0.38889	0.444447	0.38889	0.38889	0.564388	0.444447	0.277779

## Sheet: EDI
	RMGIC										RMD
	Subject 1	Subject 2	Subject 3	Subject 4	Subject 5	Subject 6	Subject 7	Subject 8	Subject 9	Subject 10	Subject 1	Subject 2	Subject 3	Subject 4	Subject 5	Subject 6	Subject 7	Subject 8	Subject 9	Subject 10
T0	0.021	0	0	0	0.021	0.021	0	0	0	0	0	0	0	0	0	0	0.021	0.021	0	0
T1	0.042	0	0.042	0.042	0.084	0.042	0.042	0.042	0.042	0	0.042	0.021	0.042	0.042	0.042	0.021	0.042	0.042	0	0.042
T2	0.084	0.084	0.042	0.042	0.042	0.042	0.084	0.042	0.042	0.021	0.084	0.042	0.021	0.042	0.042	0	0.084	0.042	0.063	0.042

## Sheet: DIAGNODent
	RMGIC										RMD
	Subject 1	Subject 2	Subject 3	Subject 4	Subject 5	Subject 6	Subject 7	Subject 8	Subject 9	Subject 10	Subject 1	Subject 2	Subject 3	Subject 4	Subject 5	Subject 6	Subject 7	Subject 8	Subject 9	Subject 10
T0	1.375	0.708333	2.65	0.75	1.04167	1.9	2.05	1.405	1.778	1.856	1.33333	0.916667	2.95833	0.958333	1.04167	2.625	1.78	1.96	1.34	2.04
T1	4.20833	3.25	5.3	5.65438	1.70833	2.28333	3.42	4.33	3.26	4.51	3.25	2.91667	4.33333	1.56944	1.86111	2.70833	2.76	3.02	4.14	1.96
T2	6.70833	4.5	7.46667	3.40278	10.4679	3.55	7.98	4.66	6.54	5.57	3.875	2.97222	4.47222	1.69444	2.06944	2.91667	4.75	3.65	5.13	3.01
