# Supplementary material for: Influence of resin modified glass ionomer cement incorporating protein-repellent and antimicrobial agents on supragingival microbiome around brackets: an in-vivo split-mouth 3-month study
Source: PeerJ. 2023 Feb 6;11:e14820. doi: 10.7717/peerj.14820 (PMC9910189; doi:10.7717/peerj.14820)
Supplement: Supplemental Information 2 [file peerj-11-14820-s002.xlsx]

## Sheet: S. mutans
	RMGIC										RMD
T0	7103.1	5741.92	6096.35	7326.61	11879.6	12770.2	4033.13	15043.4	6808.54	8905.44	4407.99	6314.21	9603.07	6406.16	10070.3	9387.35	3004.54	7533.32	7833.45	6094.35
T1	7402.66	14887.5	17697.9	5825.54	3728.93	5093.67	8033.11	15866.9	5068.98	9434.55	7311.49	4000.2	16669	5475.53	3089.99	5543.81	4522.45	5864.22	11023.4	5101.33
T2	27326.6	36555.3	12151.7	23005.6	9504.41	7103.1	9800.32	35000.1	14200.4	26774.2	8594.11	5452.96	13342.3	7206.54	9621.4	7044.66	7644.32	6894.32	12023.4	6522.19

## Sheet: F. nucleatum
	RMGIC										RMD
T0	40451.6	32542.4	221896	38928	227649	114060	78932.6	120300	69044.2	94310.3	54995.6	58629.7	163214	29002	711096	543513	350064	84501.5	68504.3	130642
T1	5.70652e+06	3.90103e+06	1.20506e+08	3.3091e+07	2.00531e+07	2.06804e+06	8.59043e+07	1e+07	2.61255e+07	8.00569e+07	13116.9	104286	180810	20054.2	11952.5	142876	150534	245026	89054.4	89343.4
T2	4.92903e+07	1.46785e+07	1.23789e+08	787204	1.11767e+07	3.22453e+06	4.607e+07	789905	8.00848e+06	1.00357e+07	192758	36050.7	408217	13116.9	35592.3	138199	70124.5	106754	20466.6	74430.6
